# Supplementary material
Source: publisher figshare collection journal article supplement (https://future-science-group.figshare.com/ndownloader/files/31491281)
Supplement: Supplementary file 1 [file 31491281]

Supplementary table 1: Demographics and health behaviors of different health zones within Alberta according to Canadian Community Health Survey*:

| Zone | Landmass (Km2) | Population (2016) | Obesity | Daily smoking | Physical exercise (active or moderately active) |
| --- | --- | --- | --- | --- | --- |
| North zone | 448,500 | 484,964 | 31% | 21% | 54% |
| Edmonton zone | 11,800 | 1,363,653 | 21% | 15% | 55% |
| Central zone | 95,000 | 478,050 | 27% | 18% | 57% |
| Calgary zone | 39,300 | 1,622,391 | 20% | 12% | 61% |
| South zone | 65,500 | 303,663 | 29% | 14% | 51% |

*Source of the information within this table: <https://www.albertahealthservices.ca/assets/about/publications/ahs-ar-2017/zones.html>
